# Supplementary figures and images for: Interstitial flow regulates the angiogenic response and phenotype of endothelial cells in a 3D culture model
Source: Royal Society of Chemistry journal article supplement (doi:10.1039/c6lc00910g), 2016-01-01

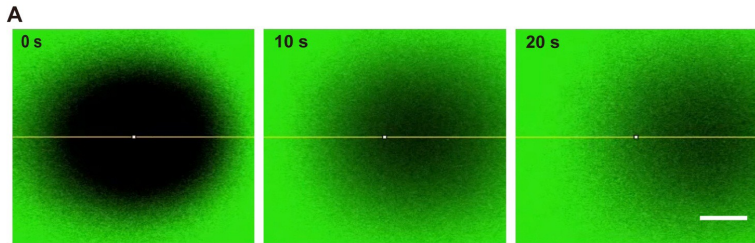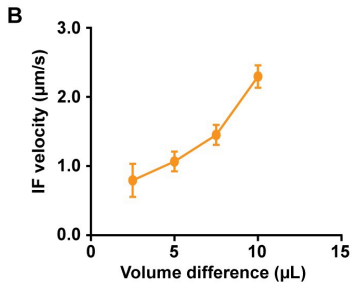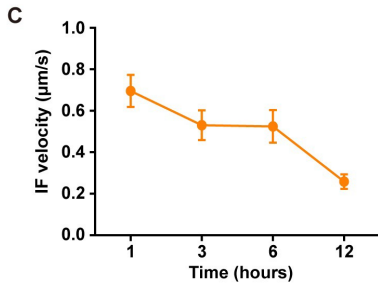

Supplement: c6lc00910g2.pdf [file c6lc00910g2.pdf]

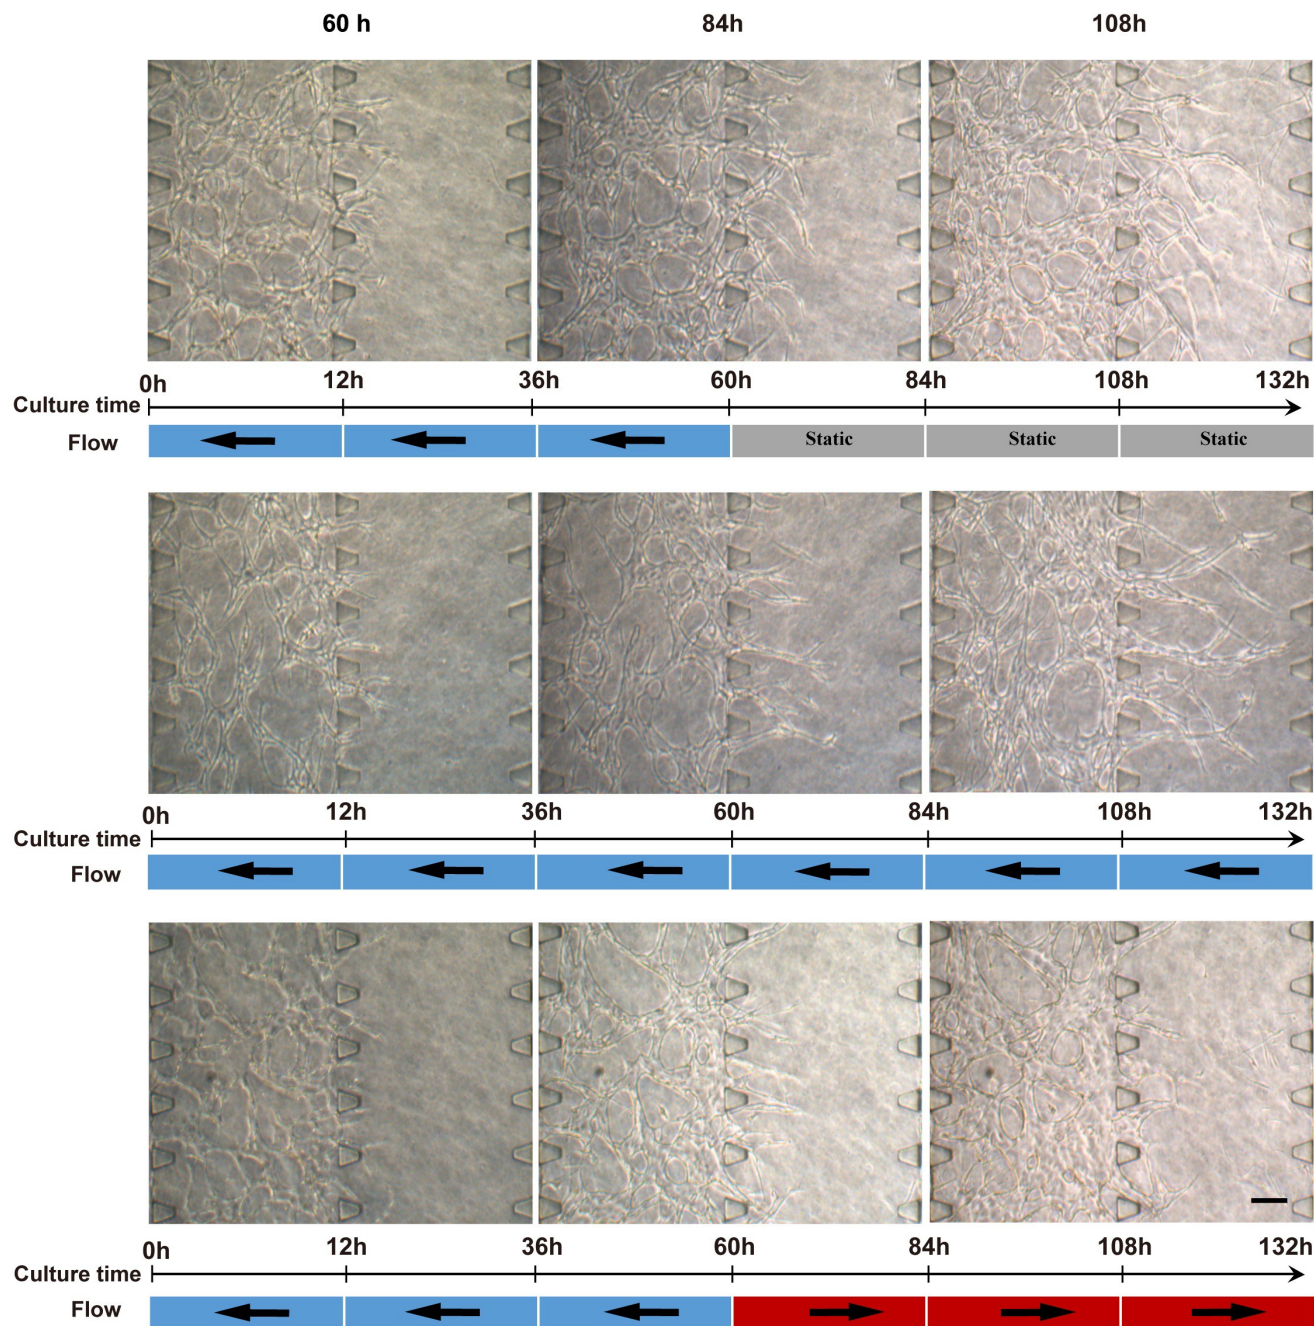

Supplement: c6lc00910g4.pdf [file c6lc00910g4.pdf]
